# Supplementary material for: Quantifying gas emissions from the “Millennium Eruption” of Paektu volcano, Democratic People’s Republic of Korea/China
Source: PubMed Central journal article supplement — Sci Adv. 2016 Nov 30;2(11):e1600913. doi: 10.1126/sciadv.1600913 (PMC5262451; doi:10.1126/sciadv.1600913), 2016-11-30
Supplement: 1600913_SM.pdf [file 1600913_SM.pdf]

## Supplementary Materials for **Quantifying gas emissions from the “Millennium Eruption” of Paektu volcano, Democratic People’s Republic of Korea/China**

Kayla Iacovino, Kim Ju-Song, Thomas Sisson, Jacob Lowenstern, Ri Kuk-Hun, Jang Jong-Nam, Song Kun-Ho, Ham Song-Hwan, Clive Oppenheimer, James O. S. Hammond, Amy Donovan, Kosima W. Liu, Ryu Kum-Ran

Published 30 November 2016, *Sci. Adv.* **2**, e1600913 (2016)

DOI: 10.1126/sciadv.1600913

### **The PDF file includes:**

- table S1. Whole-rock pumice compositions by XRF, microprobe, and FTIR.
- table S2. Major, trace, and volatile element analyses in ME MIs.
- table S3. Compositions of phases used in least squares linear regression modeling.
- table S4. Results of least squares linear regression modeling of the derivation of PEK-62 comendite from CBS-TPUM trachyte.
- table S5. H<sub>2</sub>O contents in comenditic MI and modeled saturation pressures.

### **Other Supplementary Material for this manuscript includes the following:**

(available at [advances.sciencemag.org/cgi/content/full/2/11/e1600913/DC1](http://advances.sciencemag.org/cgi/content/full/2/11/e1600913/DC1))

- table S6. Excel file listing raw FTIR data, all values necessary for calculation of H<sub>2</sub>O and CO<sub>2</sub> concentrations from FTIR data, and associated errors of measured and calculated values.
- table S7. Excel file listing all values used to calculate volatile fluxes and associated errors.

**Supplementary Materials:**

**table S1. Whole-rock pumice compositions by XRF, microprobe, and FTIR.** Major oxides normalized to 100% with original analysis totals given. Major oxides and H<sub>2</sub>O given in wt %, all others given in ppm. Major and trace elements by XRF. Cl, F, SO<sub>3</sub> in matrix glass by microprobe. H<sub>2</sub>O in matrix glass by FTIR. XRF measurements performed at the Washington State University GeoAnalytical Lab.

|                                | PKTU-TP | PEK-26 | PEK-56 | PEK-62    | CBS-TPUM |
|--------------------------------|---------|--------|--------|-----------|----------|
| SiO <sub>2</sub>               | 73.68   | 74.67  | 74.66  | 74.59     | 65.09    |
| TiO <sub>2</sub>               | 0.225   | 0.219  | 0.214  | 0.210     | 0.573    |
| Al <sub>2</sub> O <sub>3</sub> | 11.38   | 10.47  | 10.51  | 10.58     | 15.98    |
| FeO*                           | 4.08    | 4.24   | 4.21   | 4.21      | 5.13     |
| MnO                            | 0.079   | 0.078  | 0.077  | 0.077     | 0.135    |
| MgO                            | 0.01    | 0.04   | 0.03   | 0.02      | 0.36     |
| CaO                            | 0.28    | 0.26   | 0.23   | 0.22      | 1.52     |
| Na <sub>2</sub> O              | 5.58    | 5.56   | 5.60   | 5.58      | 5.52     |
| K <sub>2</sub> O               | 4.69    | 4.46   | 4.46   | 4.51      | 5.58     |
| P <sub>2</sub> O <sub>5</sub>  | 0.008   | 0.009  | 0.008  | 0.007     | 0.116    |
| Total                          | 96.04   | 97.59  | 96.42  | 96.63     | 95.78    |
| Cl                             | 4166    |        |        | 4167      | 736      |
| F                              | 2808    |        |        | 3541      | 546      |
| SO <sub>3</sub>                | 208     |        |        | 71        | 389      |
| H <sub>2</sub> O               |         |        |        | 0.3 ± 0.2 |          |
| Total alkalis                  | 10.27   | 10.02  | 10.06  | 10.09     | 11.10    |
| Subtotal                       | 96.76   |        |        | 97.43     | 95.95    |
| O=(Cl,F) <sub>2</sub>          | 0.21    |        |        | 0.24      | 0.04     |
| Total                          | 96.55   |        |        | 97.19     | 95.91    |
| Ni                             | 3       | 5      | 4      | 3         | 4        |
| Cr                             | 2       | 5      | 3      | 3         | 4        |
| Sc                             | 1       | 1      | 1      | 0         | 4        |
| V                              | 2       | 1      | 2      | 4         | 8        |
| Ba                             | 14      | 14     | 10     | 13        | 125      |
| Rb                             | 348     | 390    | 384    | 385       | 140      |
| Sr                             | 2       | 3      | 3      | 2         | 49       |
| Zr                             | 1979    | 2171   | 2138   | 2136      | 677      |
| Y                              | 123     | 138    | 138    | 136       | 45       |
| Nb                             | 234.4   | 263.9  | 261.0  | 261.5     | 85.5     |
| Ga                             | 41      | 43     | 41     | 42        | 33       |
| Cu                             | 7       | 11     | 10     | 9         | 8        |
| Zn                             | 265     | 312    | 306    | 302       | 133      |
| Pb                             | 38      | 43     | 44     | 43        | 14       |
| La                             | 155     | 155    | 153    | 152       | 79       |
| Ce                             | 299     | 307    | 303    | 301       | 154      |
| Th                             | 46      | 53     | 52     | 53        | 16       |
| Nd                             | 122     | 126    | 125    | 120       | 63       |
| U                              | 9       | 12     | 12     | 11        | 3        |

**table S2. Major, trace, and volatile element analyses in ME MIs.** (a) *c* comendite, *t* trachyte; (b) major element analysis by electron microprobe (EMP) and given in wt%; (c) molar (Na+K)/Al; (d) Cl by EMP, F and S by SHRIMP, H<sub>2</sub>O by FTIR. Analyses in ppm unless noted. (\*) FeO given as FeO total. (†) Na<sub>2</sub>O value corrected for Na loss during EMP analysis (see Materials and Methods). (‡) Measured by ATR (See Materials and Methods). *Host* is the phenocryst type hosting the inclusion (fsp=feldspar; cpx=clinopyroxene; ol=olivine; qtz=quartz). A blank space means no analysis was performed. Sample names refer to those in table S1: PKTU=PKTU-TP; P-62=PEK-62, etc. Analyses are normalized to 100% anhydrous with original major element totals given. Details of the determinations of uncertainties given in Materials and Methods.

| Sample                                 | PKTU   | PKTU  | PKTU  | PKTU  | PKTU  | PKTU  | PKTU  | PKTU  | PKTU  | PKTU  | PKTU  | PKTU  |  |
|----------------------------------------|-------|-------|-------|-------|-------|-------|--------|-------|-------|-------|-------|-------|-------|-------|-------|-------|-------|-------|--|
| Mi no.                                 | 1     | 2     | 3     | 4a    | 4b    | 5     | 6      | 7     | 8     | 9     | 10    | GM-9  | PX-2a | PX-2b | PX-3  | PX-4a | PX-4b | GM-7  |  |
| Host                                   | fsp    | fsp   | fsp   | fsp   | fsp   | fsp   | cpx   | cpx   | cpx   | cpx   | cpx   | ol    |  |
| Type <sup>a</sup>                      | c     | c     | c     | c     | c     | c     | t      | c     | c     | c     | c     | c     | c     | c     | c     | c     | c     | c     |  |
| SiO <sub>2</sub>                       |       |       |       |       |       |       |        |       |       |       |       |       |       |       |       |       |       |       |  |
| (wt%) <sup>b</sup>                     | 76.34 | 75.87 | 75.26 | 74.51 | 73.60 | 76.62 | 67.84  | 75.83 | 75.72 | 76.16 | 76.05 | 75.67 | 75.91 | 74.26 | 75.77 | 75.50 | 76.69 | 75.25 |  |
| TiO <sub>2</sub>                       | 0.21  | 0.23  | 0.22  | 0.24  | 0.22  | 0.18  | 0.01   | 0.22  | 0.21  | 0.20  | 0.21  | 0.20  | 0.22  | 0.27  | 0.24  | 0.30  | 0.23  | 0.21  |  |
| Al <sub>2</sub> O <sub>3</sub>         | 10.15 | 10.19 | 10.41 | 11.64 | 12.22 | 10.03 | 17.78  | 9.77  | 9.97  | 9.99  | 9.94  | 10.68 | 9.75  | 9.76  | 9.82  | 9.72  | 9.87  | 10.55 |  |
| FeO*                                   | 3.62  | 3.98  | 3.73  | 3.78  | 3.35  | 3.15  | 0.55   | 4.06  | 4.03  | 3.69  | 3.74  | 4.03  | 4.91  | 6.22  | 4.21  | 4.37  | 4.22  | 5.19  |  |
| MnO                                    | --    | --    | --    | --    | --    | --    | --     | --    | --    | --    | --    | 0.09  | --    | --    | --    | --    | --    | 0.14  |  |
| MgO                                    | <0.01 | <0.01 | <0.01 | <0.01 | <0.01 | <0.01 | <0.01  | <0.01 | <0.01 | <0.01 | <0.01 | <0.01 | <0.01 | <0.01 | <0.01 | <0.01 | <0.01 | <0.01 |  |
| CaO                                    | 0.19  | 0.20  | 0.22  | 0.33  | 0.37  | 0.23  | 0.00   | 0.19  | 0.23  | 0.21  | 0.19  | 0.21  | 0.26  | 0.26  | 0.25  | 0.26  | 0.26  | 0.26  |  |
| Na <sub>2</sub> O                      | 5.04† | 5.09† | 5.55† | 4.96† | 5.52† | 5.50  | 7.98†  | 5.21† | 5.42† | 5.61  | 5.56† | 4.79  | 4.58  | 4.83  | 4.74† | 4.63† | 4.44  | 4.18  |  |
| K <sub>2</sub> O                       | 4.46  | 4.45  | 4.60  | 4.54  | 4.71  | 4.29  | 5.83   | 4.72  | 4.41  | 4.14  | 4.33  | 4.33  | 4.37  | 4.38  | 4.27  | 4.33  | 4.30  | 4.21  |  |
| Subtotal                               | 89.61 | 94.96 | 93.59 | 94.36 | 92.70 | 94.34 | 100.55 | 83.03 | 96.10 | 95.16 | 97.78 | 94.45 | 97.14 | 91.34 | 98.45 | 97.90 | 97.15 | 95.90 |  |
| O=(Cl,F) <sub>2</sub>                  | 0.23  |       | 0.25  | 0.21  | 0.10  | 0.23  |        | 0.22  | 0.22  |       | 0.23  | 0.26  | 0.26  |       |       | 0.24  | 0.23  | 0.20  |  |
| Total                                  | 89.38 | 94.96 | 93.34 | 94.15 | 92.60 | 94.11 | 100.55 | 82.81 | 95.88 | 95.16 | 97.55 | 94.19 | 96.89 | 91.34 | 98.45 | 97.66 | 96.92 | 95.69 |  |
| Alkalinity <sup>c</sup>                | 1.29  | 1.30  | 1.36  | 1.12  | 1.16  | 1.36  | 1.09   | 1.40  | 1.37  | 1.37  | 1.39  | 1.18  | 1.26  | 1.30  | 1.27  | 1.27  | 1.21  | 1.08  |  |
| <i>Volatiles<sup>d</sup></i>           |       |       |       |       |       |       |        |       |       |       |       |       |       |       |       |       |       |       |  |
| Cl                                     | 3911  | 4137  | 4192  | 3133  | 2860  | 3621  |        | 3914  | 4043  | 4153  | 4058  | 4261  | 4181  | 3732  | 4632  | 4169  | 4062  | 4351  |  |
| F                                      | 3448  |       | 3590  | 3354  | 853   | 3435  |        | 3022  | 3130  |       | 3272  | 3917  | 3822  |       |       | 3360  | 3302  | 2479  |  |
| S                                      | 119   |       | 117   | 145   | 189   | 103   |        | 102   | 109   |       | 91    | 114   | 113   |       |       | 100   | 106   | 68    |  |
| H <sub>2</sub> O wt%                   | 2.73  | 1.77  | 2.95  | 2.42  | 2.02  | 2.73  | 2.94   | 1.65  | 2.70  | 2.28  | 2.18  |       |       |       | 2.25‡ | 2.82‡ |       |       |  |
| <i>Trace Elements via SHRIMP (ppm)</i> |       |       |       |       |       |       |        |       |       |       |       |       |       |       |       |       |       |       |  |
| Li                                     | 60.8  |       | 59.8  | 45.2  | 44.8  | 47.1  |        | 50.8  | 66.2  |       | 53.3  | 89.1  | 63.5  |       |       | 60.0  | 70.7  | 43.4  |  |
| Be                                     | 20.6  |       | 20.9  | 14.3  | 14.5  | 18.1  |        | 15.7  | 21.4  |       | 18.8  | 20.9  | 19.1  |       |       | 19.3  | 20.2  | 16.8  |  |
| B                                      | 29.3  |       | 29.1  | 17.4  | 22.0  | 26.5  |        | 24.2  | 30.6  |       | 26.7  | 26.6  | 27.5  |       |       | 27.6  | 28.5  | 25.3  |  |
| Mg                                     | 149.4 |       | 153.5 | 102.1 | 88.3  | 165.5 |        | 112.4 | 138.8 |       | 120.4 | 138.7 | 148.9 |       |       | 127.9 | 138.4 | 119.1 |  |
| P                                      | 6.9   |       | 6.7   | 11.7  | 9.9   | 6.8   |        | 5.7   | 7.0   |       | 6.3   | 6.0   | 6.7   |       |       | 7.0   | 7.0   | 6.2   |  |
| Cu                                     | 12.2  |       | 13.5  | 15.7  | 14.3  | 15.2  |        | 10.5  | 15.5  |       | 12.1  |       | 14.6  |       |       | 13.7  | 15.8  |       |  |
| Rb                                     | 372.2 |       | 372.1 | 351.4 | 364.7 | 329.7 |        | 372.2 | 337.0 |       | 304.4 | 344.3 | 384.5 |       |       | 341.7 | 339.5 | 268.4 |  |
| Sr                                     | 1.8   |       | 1.9   | 0.6   | 0.6   | 3.4   |        | 2.3   | 1.6   |       | 2.2   | 1.8   | 1.9   |       |       | 1.7   | 1.7   | 1.2   |  |
| Y                                      | 105.0 |       | 98.0  | 95.0  | 75.9  | 106.6 |        | 86.6  | 100.1 |       | 85.0  | 100.0 | 108.4 |       |       | 100.5 | 101.6 | 101.0 |  |
| Zr                                     | 2283  |       | 2057  | 1956  | 2135  | 2220  |        | 1968  | 2146  |       | 1828  | 2232  | 2381  |       |       | 2161  | 2191  | 2511  |  |
| Nb                                     | 320.0 |       | 282.0 | 287.1 | 244.7 | 292.5 |        | 278.7 | 272.1 |       | 239.9 | 308.6 | 409.2 |       |       | 283.9 | 284.3 | 298.2 |  |
| Cs                                     | 5.2   |       | 5.3   | 4.6   | 4.6   | 4.6   |        | 4.8   | 4.6   |       | 4.2   | 4.5   | 5.6   |       |       | 4.8   | 4.8   | 3.8   |  |
| Ba                                     | 6.6   |       | 6.1   | 1.9   | 1.8   | 13.9  |        | 10.4  | 4.9   |       | 7.9   | 5.9   | 6.2   |       |       | 5.5   | 5.6   | 5.6   |  |
| La                                     | 90.8  |       | 83.7  | 129.0 | 103.4 | 90.2  |        | 75.2  | 87.8  |       | 75.9  | 84.2  | 99.1  |       |       | 90.2  | 91.1  | 89.0  |  |
| Sm                                     | 20.3  |       | 19.6  | 22.7  | 18.1  | 21.3  |        | 17.5  | 19.6  |       | 17.6  | 19.9  | 22.8  |       |       | 20.7  | 20.4  | 20.2  |  |
| Ta                                     | 5.0   |       | 5.0   | 5.1   | 3.9   | 5.9   |        | 4.1   | 5.3   |       | 4.3   | 5.8   | 6.2   |       |       | 5.6   | 5.6   | 5.9   |  |
| Yb                                     | 11.7  |       | 11.8  | 11.2  | 8.9   | 13.5  |        | 9.1   | 12.6  |       | 10.6  | 13.3  | 14.7  |       |       | 13.7  | 13.3  | 14.4  |  |
| Hf                                     | 77.6  |       | 66.9  | 61.9  | 69.3  | 73.0  |        | 65.0  | 69.9  |       | 56.2  | 84.1  | 83.2  |       |       | 72.8  | 72.2  | 78.3  |  |
| Pb                                     | 98.5  |       | 99.4  | 81.9  | 67.0  | 107.1 |        | 80.9  | 105.8 |       | 82.8  | 91.1  | 104.9 |       |       | 105.7 | 104.7 | 91.8  |  |
| Th                                     | 46.4  |       | 43.6  | 41.5  | 38.4  | 50.0  |        | 37.5  | 44.9  |       | 37.3  | 55.0  | 52.9  |       |       | 47.4  | 47.6  | 46.8  |  |
| U                                      | 11.0  |       | 10.3  | 9.5   | 8.7   | 11.4  |        | 9.3   | 10.1  |       | 8.6   | 12.0  | 12.2  |       |       | 10.6  | 10.8  | 10.3  |  |

table S2 (continued, p2)

| Sample                                 | PKTU  | PKTU   | PKTU   | PKTU   | PKTU  | PKTU  | PKTU  | P-26  | P-26  | P-26  | P-56  | P-56  | P-56  | P-56  | P-56  | P-56  | P-62  | P-62  |
|----------------------------------------|-------|--------|--------|--------|-------|-------|-------|-------|-------|-------|-------|-------|-------|-------|-------|-------|-------|-------|
| Mi no.                                 | GM-8  | GM-10a | GM-10b | GM-10c | GM-11 | GM-12 | GM-14 | 1     | PX-1a | PX-1b | 2     | PX-1a | PX-1b | PX-1c | PX-3a | PX-3b | 1     | 2a    |
| Host                                   | qtz   | qtz    | qtz    | qtz    | qtz   | qtz   | qtz   | fsp   | cpx   | cpx   | fsp   | cpx   | cpx   | cpx   | cpx   | cpx   | fsp   | fsp   |
| Type <sup>a</sup>                      | c     | c      | c      | c      | c     | c     | c     | c     | c     | c     | c     | c     | c     | c     | c     | c     | c     | c     |
| SiO <sub>2</sub> (wt%) <sup>b</sup>    | 76.52 | 76.22  | 75.87  | 75.81  | 75.54 | 75.39 | 75.37 | 74.75 | 74.03 | 74.41 | 75.45 | 76.22 | 74.87 | 74.34 | 74.35 | 73.85 | 75.32 | 75.52 |
| TiO <sub>2</sub>                       | 0.17  | 0.19   | 0.20   | 0.13   | 0.19  | 0.22  | 0.19  | 0.21  | 0.23  | 0.23  | 0.20  | 0.20  | 0.00  | 0.60  | 0.23  | 0.23  | 0.20  | 0.23  |
| Al <sub>2</sub> O <sub>3</sub>         | 10.41 | 10.51  | 10.28  | 10.52  | 10.41 | 10.19 | 10.50 | 10.72 | 10.39 | 10.63 | 10.66 | 10.57 | 10.60 | 10.43 | 10.66 | 10.66 | 10.46 | 10.14 |
| FeO*                                   | 4.20  | 4.21   | 4.30   | 4.11   | 4.28  | 4.46  | 4.23  | 4.11  | 4.34  | 4.59  | 3.99  | 4.72  | 5.00  | 5.15  | 5.00  | 4.36  | 3.91  | 4.32  |
| MnO                                    | 0.10  | 0.09   | 0.11   | 0.06   | 0.10  | 0.09  | 0.10  | 0.10  | 0.11  | 0.12  | 0.07  | 0.09  | 0.00  | 0.11  | 0.16  | 0.23  | 0.09  | 0.10  |
| MgO                                    | 0.01  | <0.01  | 0.01   | 0.01   | <0.01 | 0.01  | <0.01 | <0.01 | <0.01 | <0.01 | <0.01 | <0.01 | <0.01 | 0.01  | <0.01 | 0.17  | <0.01 | <0.01 |
| CaO                                    | 0.25  | 0.21   | 0.20   | 0.18   | 0.20  | 0.21  | 0.23  | 0.20  | 0.25  | 0.26  | 0.19  | 0.25  | 0.00  | 0.20  | 0.36  | 2.06  | 0.21  | 0.19  |
| Na <sub>2</sub> O                      | 4.26  | 4.40   | 4.73   | 4.88   | 4.78  | 5.05  | 4.91  | 5.22  | 6.26  | 5.36  | 5.04  | 4.61  | 5.00  | 4.73  | 4.95  | 4.28  | 5.38  | 5.15  |
| K <sub>2</sub> O                       | 4.08  | 4.16   | 4.30   | 4.31   | 4.50  | 4.37  | 4.47  | 4.68  | 4.38  | 4.41  | 4.40  | 3.36  | 4.53  | 4.43  | 4.27  | 4.15  | 4.43  | 4.35  |
| Subtotal                               | 93.06 | 95.64  | 94.59  | 94.50  | 93.69 | 95.19 | 94.22 | 92.15 | 94.75 | 91.88 | 95.23 | 94.24 | 91.96 | 93.11 | 92.38 | 93.05 | 93.86 | 91.38 |
| O=(Cl,F) <sub>2</sub>                  | 0.27  | 0.26   | 0.27   | 0.22   | 0.26  | 0.26  | 0.25  | 0.22  | 0.25  | 0.24  | 0.24  |       |       |       |       |       | 0.21  | 0.22  |
| Total                                  | 92.79 | 95.38  | 94.32  | 94.28  | 93.43 | 94.93 | 93.97 | 91.93 | 94.50 | 91.64 | 94.99 | 94.24 | 91.96 | 93.11 | 92.38 | 93.05 | 93.65 | 91.16 |
| Alkalinity <sup>c</sup>                | 1.10  | 1.12   | 1.21   | 1.21   | 1.22  | 1.28  | 1.23  | 1.27  | 1.45  | 1.28  | 1.23  | 1.06  | 1.24  | 1.21  | 1.20  | 1.08  | 1.30  | 1.30  |
| <i>Volatiles<sup>d</sup></i>           |       |        |        |        |       |       |       |       |       |       |       |       |       |       |       |       |       |       |
| Cl                                     | 4400  | 4200   | 4500   | 3600   | 4500  | 4500  | 4300  | 4352  | 4337  | 4171  | 3985  | 4540  | 0     | 4228  | 3869  | 3059  | 3995  | 4033  |
| F                                      | 3950  | 3809   | 3931   | 3346   | 3717  | 3734  | 3651  | 2915  | 3585  | 3411  | 3460  |       |       |       |       |       | 2880  | 3061  |
| S                                      | 126   | 112    | 126    | 160    | 121   | 116   | 124   | 109   | 115   | 118   | 92    |       |       |       |       |       | 107   | 118   |
| H <sub>2</sub> O wt%                   |       |        |        |        |       |       |       | 2.94  | 4.36  | 2.62  |       |       |       |       |       |       | 3.00  | 1.85  |
| <i>Trace Elements via SHRIMP (ppm)</i> |       |        |        |        |       |       |       |       |       |       |       |       |       |       |       |       |       |       |
| Li                                     | 68.7  | 2.6    | 84.9   | 13.7   | 72.9  | 69.9  | 59.2  | 63.7  | 56.8  | 49.0  | 65.4  |       |       |       |       |       | 60.4  | 62.3  |
| Be                                     | 22.5  | 4.0    | 21.8   | 19.0   | 22.0  | 19.4  | 16.0  | 17.6  | 18.7  | 18.0  | 18.8  |       |       |       |       |       | 16.9  | 20.5  |
| B                                      | 29.4  | 26.8   | 28.1   | 37.5   | 28.9  | 25.7  | 21.9  | 25.0  | 28.6  | 28.2  | 24.8  |       |       |       |       |       | 23.4  | 29.6  |
| Mg                                     | 139.0 | 147.8  | 148.7  | 149.2  | 139.8 | 296.9 | 153.2 | 136.3 | 776.6 | 750.2 | 125.6 |       |       |       |       |       | 144.8 | 262.7 |
| P                                      | 7.1   | 7.6    | 6.9    | 13.7   | 7.2   | 6.7   | 7.2   | 6.0   | 7.3   | 6.8   | 6.6   |       |       |       |       |       | 6.1   | 7.8   |
| Cu                                     |       |        |        |        |       |       |       | 13.9  | 14.8  | 14.2  |       |       |       |       |       |       | 14.0  | 13.6  |
| Rb                                     | 386.2 | 354.1  | 360.5  | 329.3  | 355.8 | 362.3 | 357.4 | 366.2 | 342.4 | 335.7 | 281.7 |       |       |       |       |       | 325.2 | 338.1 |
| Sr                                     | 1.5   | 1.9    | 1.8    | 1.7    | 1.6   | 1.3   | 2.0   | 1.7   | 1.9   | 1.7   | 1.8   |       |       |       |       |       | 1.7   | 2.2   |
| Y                                      | 105.8 | 107.3  | 107.5  | 57.5   | 103.3 | 101.9 | 110.5 | 95.6  | 127.5 | 121.5 | 98.2  |       |       |       |       |       | 97.3  | 94.9  |
| Zr                                     | 2386  | 2513   | 2449   | 2019   | 2353  | 2525  | 2570  | 2018  | 2340  | 2383  | 2252  |       |       |       |       |       | 2030  | 2168  |
| Nb                                     | 302.0 | 302.9  | 302.4  | 256.1  | 285.5 | 319.6 | 296.1 | 268.7 | 297.7 | 303.7 | 300.0 |       |       |       |       |       | 272.4 | 291.2 |
| Cs                                     | 5.5   | 4.6    | 4.8    | 4.5    | 4.9   | 4.7   | 4.7   | 5.0   | 5.0   | 5.1   | 3.4   |       |       |       |       |       | 4.4   | 4.5   |
| Ba                                     | 6.3   | 7.1    | 6.5    | 6.1    | 5.7   | 5.6   | 7.0   | 6.0   | 5.3   | 4.9   | 6.0   |       |       |       |       |       | 5.4   | 8.0   |
| La                                     | 87.9  | 90.4   | 91.8   | 52.0   | 86.0  | 85.8  | 89.2  | 80.9  | 119.2 | 112.6 | 84.6  |       |       |       |       |       | 82.9  | 88.5  |
| Sm                                     | 21.2  | 19.9   | 20.4   | 14.0   | 20.0  | 19.7  | 21.8  | 18.7  | 28.2  | 28.0  | 19.6  |       |       |       |       |       | 18.8  | 18.2  |
| Ta                                     | 6.3   | 5.4    | 5.7    | 3.3    | 5.3   | 5.9   | 6.9   | 5.1   | 7.6   | 7.5   | 5.7   |       |       |       |       |       | 5.0   | 4.7   |
| Yb                                     | 15.3  | 12.8   | 15.6   | 6.1    | 12.3  | 13.9  | 15.2  | 11.5  | 18.7  | 19.1  | 13.4  |       |       |       |       |       | 11.4  | 11.2  |
| Hf                                     | 74.0  | 79.7   | 87.3   | 49.9   | 73.5  | 92.2  | 95.5  | 69.1  | 74.5  | 75.9  | 83.0  |       |       |       |       |       | 67.2  | 72.6  |
| Pb                                     | 125.0 | 103.7  | 107.4  | 73.1   | 108.3 | 96.9  | 102.5 | 96.4  | 113.6 | 105.5 | 81.4  |       |       |       |       |       | 98.0  | 97.4  |
| Th                                     | 48.0  | 50.5   | 53.9   | 34.9   | 46.6  | 56.0  | 57.3  | 44.1  | 54.6  | 51.5  | 51.1  |       |       |       |       |       | 43.8  | 41.9  |
| U                                      | 9.6   | 10.6   | 11.2   | 7.6    | 10.5  | 12.2  | 12.3  | 10.2  | 12.1  | 11.5  | 11.5  |       |       |       |       |       | 10.1  | 10.3  |

table S2 (continued, p3)

| Sample                                 | P-62  |
|----------------------------------------|-------|-------|-------|-------|-------|-------|-------|-------|-------|-------|-------|-------|-------|-------|-------|-------|-------|-------|
| Mi no.                                 | 2b    | 3     | 6     | 7a    | 7b    | 7c    | 8     | 9     | 10    | 12a   | 12b   | 14    | 15    | 16    | 17    | 18    | GM-1  | GM-2  |
| Host                                   | fsp   |
| Type <sup>a</sup>                      | c     | c     | c     | c     | c     | c     | c     | c     | c     | c     | c     | c     | c     | c     | c     | c     | c     | c     |
| SiO <sub>2</sub> (wt%) <sup>b</sup>    | 75.65 | 76.14 | 75.47 | 73.98 | 73.80 | 75.12 | 75.42 | 75.05 | 75.48 | 74.67 | 74.96 | 75.29 | 75.55 | 74.95 | 73.04 | 73.87 | 76.02 | 76.73 |
| TiO <sub>2</sub>                       | 0.24  | 0.26  | 0.20  | 0.41  | 0.38  | 0.23  | 0.18  | 0.20  | 0.21  | 0.20  | 0.20  | 0.20  | 0.19  | 0.19  | 0.18  | 0.18  | 0.19  | 0.09  |
| Al <sub>2</sub> O <sub>3</sub>         | 10.00 | 10.20 | 10.39 | 10.57 | 10.50 | 10.56 | 10.45 | 10.46 | 10.54 | 10.46 | 10.65 | 10.64 | 10.57 | 10.62 | 14.80 | 12.34 | 10.76 | 10.46 |
| FeO*                                   | 4.17  | 3.92  | 3.88  | 4.94  | 5.02  | 3.87  | 3.88  | 3.97  | 3.90  | 4.07  | 3.99  | 3.90  | 4.09  | 3.92  | 2.20  | 3.35  | 4.22  | 4.11  |
| MnO                                    | 0.09  | 0.11  | 0.10  | 0.16  | 0.15  | 0.10  | 0.10  | 0.08  | 0.10  | 0.11  | 0.09  | 0.09  | 0.09  | 0.09  | 0.09  | 0.10  | 0.07  | 0.05  |
| MgO                                    | <0.01 | 0.03  | <0.01 | <0.01 | 0.01  | <0.01 | <0.01 | <0.01 | <0.01 | <0.01 | <0.01 | 0.01  | <0.01 | <0.01 | <0.01 | 0.01  | <0.01 | <0.01 |
| CaO                                    | 0.20  | 0.22  | 0.21  | 0.53  | 0.57  | 0.35  | 0.17  | 0.18  | 0.21  | 0.21  | 0.18  | 0.21  | 0.20  | 0.18  | 0.05  | 0.13  | 0.22  | 0.14  |
| Na <sub>2</sub> O                      | 5.28  | 4.71† | 5.27  | 4.99  | 5.16  | 5.26  | 5.46  | 5.65  | 5.23  | 5.89  | 5.40  | 5.22  | 4.96  | 5.66  | 4.53  | 5.11  | 4.47  | 4.29  |
| K <sub>2</sub> O                       | 4.37  | 4.39  | 4.48  | 4.43  | 4.43  | 4.50  | 4.34  | 4.41  | 4.34  | 4.38  | 4.51  | 4.45  | 4.35  | 4.39  | 5.10  | 4.91  | 4.04  | 4.14  |
| Subtotal                               | 92.92 | 91.14 | 91.70 | 93.42 | 93.42 | 93.56 | 94.48 | 94.18 | 94.49 | 94.21 | 92.10 | 93.40 | 94.28 | 92.58 | 92.89 | 93.33 | 94.46 | 93.77 |
| O=(Cl,F) <sub>2</sub>                  | 0.22  |       | 0.20  | 0.26  | 0.24  | 0.24  | 0.23  | 0.23  | 0.24  |       |       | 0.24  |       | 0.25  | 0.24  | 0.23  | 0.24  | 0.21  |
| Total                                  | 92.69 | 91.14 | 91.50 | 93.16 | 93.18 | 93.32 | 94.25 | 93.95 | 94.25 | 94.21 | 92.10 | 93.16 | 94.28 | 92.34 | 92.65 | 93.10 | 94.22 | 93.56 |
| Alkalinity <sup>c</sup>                | 1.34  | 1.23  | 1.30  | 1.23  | 1.26  | 1.28  | 1.31  | 1.34  | 1.26  | 1.38  | 1.29  | 1.26  | 1.22  | 1.33  | 0.88  | 1.11  | 1.09  | 1.10  |
| <i>Volatiles<sup>d</sup></i>           |       |       |       |       |       |       |       |       |       |       |       |       |       |       |       |       |       |       |
| Cl                                     | 4134  | 3310  | 3775  | 4452  | 4545  | 4045  | 4173  | 3925  | 3968  | 4163  | 4215  | 4190  | 4010  | 4054  | 4050  | 4054  | 4400  | 3000  |
| F                                      | 3104  |       | 2668  | 3677  | 3233  | 3612  | 3259  | 3268  | 3549  |       |       | 3373  |       | 3653  | 3459  | 3277  | 3419  | 3445  |
| S                                      | 108   |       | 78    | 165   | 132   | 122   | 109   | 113   | 99    |       |       | 107   |       | 103   | 112   | 122   | 112   | 89    |
| H <sub>2</sub> O wt%                   | 2.39  | 1.48  | 3.30  | 1.39  | 1.88  | 2.32  | 2.82  | 3.31  | 1.71  | 1.77  | 2.33  | 1.82  | 2.90  | 4.23  |       | 1.71  |       |       |
| <i>Trace Elements via SHRIMP (ppm)</i> |       |       |       |       |       |       |       |       |       |       |       |       |       |       |       |       |       |       |
| Li                                     | 62.4  |       | 41.6  | 65.0  | 54.8  | 59.9  | 58.4  | 57.0  | 54.1  |       |       | 62.9  |       | 70.1  | 84.0  | 55.5  | 69.1  | 66.7  |
| Be                                     | 20.0  |       | 15.6  | 17.8  | 14.9  | 19.7  | 20.6  | 18.9  | 19.3  |       |       | 20.1  |       | 20.6  | 20.7  | 20.3  | 21.9  | 20.5  |
| B                                      | 30.2  |       | 21.6  | 25.9  | 20.7  | 29.9  | 29.3  | 27.2  | 27.8  |       |       | 26.8  |       | 27.2  | 27.1  | 25.6  | 28.9  | 26.4  |
| Mg                                     | 125.3 |       | 87.4  | 259.0 | 213.6 | 179.2 | 144.4 | 128.3 | 166.9 |       |       | 173.1 |       | 118.4 | 127.6 | 130.2 | 143.6 | 115.2 |
| P                                      | 8.2   |       | 5.5   | 23.3  | 18.9  | 3.9   | 6.8   | 6.8   | 6.6   |       |       | 7.6   |       | 6.8   | 6.1   | 7.4   | 6.8   | 6.0   |
| Cu                                     | 15.2  |       | 9.7   | 20.5  | 17.4  | 16.1  | 15.0  | 15.3  | 15.1  |       |       |       |       |       |       |       |       |       |
| Rb                                     | 336.8 |       | 282.4 | 323.4 | 295.5 | 360.2 | 363.9 | 362.2 | 361.8 |       |       | 320.6 |       | 348.9 | 357.9 | 327.4 | 362.5 | 295.3 |
| Sr                                     | 1.5   |       | 3.2   | 2.3   | 2.6   | 1.8   | 1.8   | 1.6   | 2.3   |       |       | 2.2   |       | 1.5   | 1.4   | 1.5   | 1.6   | 1.8   |
| Y                                      | 104.5 |       | 72.0  | 102.6 | 84.9  | 109.1 | 104.5 | 108.3 | 107.4 |       |       | 102.6 |       | 104.2 | 96.7  | 99.5  | 106.1 | 83.5  |
| Zr                                     | 2274  |       | 1595  | 2475  | 2036  | 2364  | 2191  | 2324  | 2255  |       |       | 2181  |       | 2266  | 2170  | 2383  | 2239  | 1839  |
| Nb                                     | 292.6 |       | 217.9 | 291.6 | 238.6 | 306.7 | 288.6 | 302.1 | 292.1 |       |       | 294.7 |       | 289.9 | 285.7 | 277.4 | 288.6 | 245.9 |
| Cs                                     | 4.8   |       | 3.5   | 4.5   | 3.8   | 5.5   | 5.0   | 5.2   | 5.0   |       |       | 4.6   |       | 4.7   | 4.2   | 4.5   | 5.2   | 4.0   |
| Ba                                     | 5.0   |       | 13.9  | 6.7   | 9.7   | 6.2   | 6.0   | 5.5   | 10.5  |       |       | 8.9   |       | 5.5   | 5.3   | 6.1   | 6.1   | 6.3   |
| La                                     | 84.7  |       | 60.0  | 182.5 | 150.7 | 99.5  | 88.1  | 90.4  | 91.8  |       |       | 87.3  |       | 85.7  | 85.9  | 83.9  | 82.0  | 71.0  |
| Sm                                     | 19.8  |       | 14.6  | 26.1  | 22.1  | 22.6  | 20.5  | 21.4  | 21.3  |       |       | 20.9  |       | 20.8  | 19.6  | 20.7  | 20.3  | 18.5  |
| Ta                                     | 5.3   |       | 3.8   | 6.3   | 5.0   | 5.7   | 5.5   | 5.7   | 5.7   |       |       | 5.9   |       | 6.4   | 5.8   | 6.5   | 6.1   | 5.4   |
| Yb                                     | 12.7  |       | 8.5   | 14.5  | 12.7  | 13.9  | 12.1  | 13.6  | 13.9  |       |       | 14.2  |       | 13.6  | 13.1  | 13.3  | 13.6  | 12.2  |
| Hf                                     | 71.3  |       | 51.3  | 83.2  | 69.9  | 78.6  | 71.6  | 75.7  | 74.6  |       |       | 76.8  |       | 76.3  | 84.4  | 85.0  | 72.0  | 62.6  |
| Pb                                     | 103.0 |       | 62.8  | 142.4 | 122.2 | 116.4 | 106.3 | 108.8 | 106.4 |       |       | 105.6 |       | 109.4 | 95.8  | 110.4 | 114.9 | 93.9  |
| Th                                     | 46.1  |       | 31.5  | 51.7  | 43.5  | 50.2  | 47.5  | 49.2  | 49.8  |       |       | 50.7  |       | 52.3  | 50.9  | 50.0  | 48.7  | 44.6  |
| U                                      | 10.7  |       | 7.5   | 10.7  | 8.9   | 11.5  | 10.9  | 11.4  | 11.2  |       |       | 11.4  |       | 11.3  | 11.7  | 12.0  | 10.7  | 10.3  |

table S2 (continued, p4)

| Sample                                 | P-62  | CBS   | CBS   | CBS   |
|----------------------------------------|-------|-------|-------|-------|-------|-------|-------|-------|-------|-------|-------|-------|-------|-------|-------|-------|-------|-------|
| Mi no.                                 | GM-4  | GM-5  | GM-9a | GM-9b | GM-10 | GM-11 | PX-1a | PX-1b | PX-2a | PX-2b | PX-3  | GM-7  | GM-6  | GM-8  | GM-3  | 1a    | 1b    | 2a    |
| Host                                   | fsp   | fsp   | fsp   | fsp   | fsp   | fsp   | cpx   | cpx   | cpx   | cpx   | cpx   | cpx   | ol    | ol    | qtz   | fsp   | fsp   | fsp   |
| Type <sup>a</sup>                      | c     | c     | c     | c     | c     | c     | c     | c     | c     | c     | c     | c     | c     | c     | c     | t     | t     | c     |
| SiO <sub>2</sub> (wt%) <sup>b</sup>    | 76.11 | 75.97 | 76.25 | 76.79 | 76.62 | 76.28 | 74.59 | 73.97 | 74.45 | 74.82 | 70.86 | 76.64 | 74.64 | 76.63 | 75.98 | 65.41 | 65.27 | 74.04 |
| TiO <sub>2</sub>                       | 0.19  | 0.19  | 0.20  | 0.14  | 0.19  | 0.21  | 0.20  | 0.17  | 0.27  | 0.20  | 0.27  | 0.18  | 0.20  | 0.16  | 0.18  | 0.43  | 0.42  | 0.23  |
| Al <sub>2</sub> O <sub>3</sub>         | 10.40 | 10.51 | 10.57 | 10.50 | 10.16 | 10.48 | 11.13 | 10.75 | 11.44 | 10.82 | 13.63 | 10.63 | 10.47 | 10.09 | 10.74 | 15.87 | 16.28 | 10.74 |
| FeO*                                   | 4.47  | 4.03  | 4.20  | 3.81  | 4.05  | 4.03  | 4.27  | 4.74  | 4.10  | 4.47  | 3.77  | 4.54  | 5.61  | 5.02  | 4.27  | 4.59  | 4.51  | 4.30  |
| MnO                                    | 0.07  | 0.08  | 0.10  | 0.09  | 0.08  | 0.09  | 0.10  | 0.16  | 0.12  | 0.11  | 0.10  | 0.11  | 0.14  | 0.11  | 0.08  | 0.15  | 0.18  | 0.10  |
| MgO                                    | 0.01  | <0.01 | <0.01 | <0.01 | <0.01 | 0.01  | <0.01 | <0.01 | <0.01 | 0.01  | <0.01 | <0.01 | 0.01  | <0.01 | <0.01 | 0.16  | 0.17  | 0.01  |
| CaO                                    | 0.22  | 0.23  | 0.21  | 0.22  | 0.21  | 0.22  | 0.26  | 0.46  | 0.26  | 0.59  | 0.25  | 0.27  | 0.23  | 0.22  | 0.21  | 1.33  | 1.39  | 0.22  |
| Na <sub>2</sub> O                      | 4.52  | 4.86  | 4.34  | 4.39  | 4.57  | 4.48  | 4.79  | 5.25  | 4.77  | 4.55  | 6.15  | 3.48  | 4.59  | 3.79  | 4.39  | 6.25  | 5.87  | 5.88  |
| K <sub>2</sub> O                       | 4.01  | 4.13  | 4.13  | 4.05  | 4.11  | 4.21  | 4.66  | 4.50  | 4.60  | 4.43  | 4.97  | 4.15  | 4.11  | 3.97  | 4.15  | 5.82  | 5.90  | 4.49  |
| Subtotal                               | 93.83 | 95.46 | 94.47 | 95.71 | 94.74 | 94.14 | 92.16 | 95.46 | 92.60 | 93.52 | 94.82 | 94.87 | 96.20 | 97.02 | 95.09 | 97.60 | 95.89 | 93.78 |
| O=(Cl,F) <sub>2</sub>                  | 0.23  | 0.24  | 0.24  | 0.22  | 0.24  | 0.24  |       |       |       |       |       | 0.22  | 0.28  | 0.23  | 0.23  |       |       | 0.23  |
| Total                                  | 93.60 | 95.22 | 94.23 | 95.49 | 94.50 | 93.90 | 92.16 | 95.46 | 92.60 | 93.52 | 94.82 | 94.65 | 95.92 | 96.79 | 94.86 | 97.60 | 95.89 | 93.55 |
| Alkalinity <sup>c</sup>                | 1.13  | 1.19  | 1.10  | 1.11  | 1.18  | 1.14  | 1.16  | 1.26  | 1.12  | 1.13  | 1.14  | 0.96  | 1.15  | 1.05  | 1.09  | 1.04  | 0.99  | 1.35  |
| <i>Volatiles<sup>d</sup></i>           |       |       |       |       |       |       |       |       |       |       |       |       |       |       |       |       |       |       |
| Cl                                     | 3900  | 4200  | 4100  | 3700  | 4100  | 4161  | 3777  | 4093  | 4056  | 4001  | 2580  | 3900  | 5166  | 3808  | 3800  | 858   | 979   | 3976  |
| F                                      | 3482  | 3440  | 3398  | 3331  | 3500  | 3455  |       |       |       |       |       | 3061  | 3872  | 3448  | 3544  |       |       | 3427  |
| S                                      | 106   | 109   | 106   | 103   | 109   | 110   |       |       |       |       |       | 140   | 117   | 103   | 111   |       |       | 73    |
| H <sub>2</sub> O wt%                   |       |       |       |       |       |       |       |       |       |       | 1.58  |       |       |       |       | 1.17  |       | 2.26  |
| <i>Trace Elements via SHRIMP (ppm)</i> |       |       |       |       |       |       |       |       |       |       |       |       |       |       |       |       |       |       |
| Li                                     | 69.4  | 66.1  | 72.1  | 70.0  | 86.7  | 78.2  |       |       |       |       |       | 73.2  | 81.2  | 77.8  | 62.5  |       |       | 92.2  |
| Be                                     | 19.4  | 18.7  | 20.2  | 20.1  | 22.1  | 20.8  |       |       |       |       |       | 19.5  | 21.2  | 21.0  | 19.7  |       |       | 19.3  |
| B                                      | 26.0  | 25.2  | 26.7  | 26.6  | 29.0  | 27.0  |       |       |       |       |       | 25.1  | 33.0  | 28.0  | 27.6  |       |       | 25.1  |
| Mg                                     | 144.2 | 137.4 | 133.5 | 144.0 | 140.9 | 138.1 |       |       |       |       |       | 2904  | 146.0 | 133.0 | 126.8 |       |       | 179.7 |
| P                                      | 8.0   | 7.1   | 7.0   | 8.4   | 7.2   | 7.5   |       |       |       |       |       | 6.7   | 22.6  | 7.1   | 7.0   |       |       | 9.1   |
| Cu                                     |       |       |       |       |       |       |       |       |       |       |       |       |       |       |       |       |       |       |
| Rb                                     | 346.4 | 351.0 | 345.5 | 368.3 | 353.0 | 350.8 |       |       |       |       |       | 313.0 | 411.1 | 348.4 | 355.5 |       |       | 351.4 |
| Sr                                     | 1.8   | 1.7   | 1.8   | 1.9   | 1.7   | 1.8   |       |       |       |       |       | 3.1   | 2.2   | 1.6   | 1.6   |       |       | 1.8   |
| Y                                      | 102.4 | 102.2 | 101.4 | 106.8 | 103.2 | 101.4 |       |       |       |       |       | 113.8 | 110.2 | 98.1  | 106.4 |       |       | 91.9  |
| Zr                                     | 2266  | 2274  | 2118  | 2246  | 2270  | 2230  |       |       |       |       |       | 1933  | 2988  | 2180  | 2419  |       |       | 2136  |
| Nb                                     | 288.6 | 288.8 | 280.3 | 296.5 | 294.9 | 283.9 |       |       |       |       |       | 249.6 | 371.1 | 282.1 | 304.9 |       |       | 288.2 |
| Cs                                     | 4.8   | 4.8   | 4.8   | 5.2   | 5.0   | 4.9   |       |       |       |       |       | 4.5   | 6.1   | 4.8   | 5.0   |       |       | 4.9   |
| Ba                                     | 6.4   | 5.9   | 6.0   | 7.0   | 5.9   | 6.0   |       |       |       |       |       | 5.1   | 5.8   | 5.2   | 5.6   |       |       | 7.7   |
| La                                     | 91.3  | 91.8  | 89.0  | 93.2  | 92.9  | 91.6  |       |       |       |       |       | 96.4  | 86.0  | 86.9  | 91.8  |       |       | 89.9  |
| Sm                                     | 21.0  | 20.9  | 20.4  | 21.6  | 21.8  | 21.7  |       |       |       |       |       | 29.1  | 21.7  | 20.1  | 21.3  |       |       | 20.8  |
| Ta                                     | 5.7   | 5.3   | 5.6   | 5.8   | 5.7   | 5.8   |       |       |       |       |       | 7.7   | 6.4   | 5.4   | 6.1   |       |       | 4.8   |
| Yb                                     | 13.0  | 13.1  | 13.7  | 13.4  | 12.9  | 13.3  |       |       |       |       |       | 20.4  | 14.0  | 12.7  | 14.1  |       |       | 11.4  |
| Hf                                     | 71.9  | 72.8  | 69.8  | 76.7  | 71.9  | 71.3  |       |       |       |       |       | 62.0  | 97.8  | 71.7  | 79.5  |       |       | 70.7  |
| Pb                                     | 104.0 | 101.9 | 104.2 | 111.0 | 105.1 | 104.6 |       |       |       |       |       | 90.3  | 132.8 | 96.1  | 111.4 |       |       | 80.7  |
| Th                                     | 48.7  | 47.9  | 46.3  | 50.8  | 49.2  | 47.0  |       |       |       |       |       | 40.1  | 67.5  | 45.1  | 53.0  |       |       | 44.9  |
| U                                      | 10.7  | 11.3  | 10.1  | 11.5  | 11.4  | 10.7  |       |       |       |       |       | 8.6   | 15.8  | 10.1  | 12.0  |       |       | 10.2  |

table S2 (continued, p5)

| Sample                                 | CBS      |          |
|----------------------------------------|----------|----------|----------|----------|----------|----------|----------|----------|----------|----------|----------|----------|----------|----------|----------|----------|----------|----------|----------|
| Mi no.                                 | 3a       | 3b       | 4        | 5        | 7        | 8        | 9a       | 9b       | GM-8     | GM-9     | GM-10    | GM-11    | PX-1a    | PX-1c    | PX-1d    | PX-2     | PX-5     | PX-8a    |          |
| Host Type <sup>a</sup>                 | fsp<br>t | fsp<br>t | fsp<br>t | fsp<br>t | fsp<br>t | fsp<br>c | fsp<br>t | cpx<br>c | cpx<br>c | cpx<br>c | cpx<br>t | cpx<br>t | cpx<br>t |
| SiO <sub>2</sub> (wt%) <sup>b</sup>    | 65.00    | 64.70    | 65.41    | 65.56    | 65.44    | 75.51    | 65.95    | 64.86    | 65.66    | 65.99    | 66.26    | 67.48    | 74.89    | 74.13    | 74.14    | 67.74    | 66.06    | 64.98    |          |
| TiO <sub>2</sub>                       | 0.45     | 0.42     | 0.43     | 0.40     | 0.50     | 0.22     | 0.43     | 0.55     | 0.56     | 0.42     | 0.40     | 0.27     | 0.20     | 0.23     | 0.20     | 0.37     | 0.48     | 0.40     |          |
| Al <sub>2</sub> O <sub>3</sub>         | 16.78    | 16.82    | 15.91    | 17.04    | 15.81    | 10.51    | 16.29    | 16.05    | 15.87    | 16.18    | 15.76    | 15.42    | 10.49    | 10.35    | 10.45    | 15.85    | 15.88    | 15.60    |          |
| FeO*                                   | 4.08     | 4.07     | 4.80     | 3.74     | 5.07     | 4.14     | 4.38     | 5.66     | 5.22     | 4.33     | 4.69     | 4.21     | 4.58     | 4.66     | 4.58     | 3.40     | 4.82     | 5.73     |          |
| MnO                                    | 0.13     | 0.13     | 0.15     | 0.11     | 0.16     | 0.09     | 0.14     | 0.18     | 0.18     | 0.14     | 0.15     | 0.13     | 0.07     | 0.13     | 0.11     | 0.11     | 0.15     | 0.20     |          |
| MgO                                    | 0.20     | 0.20     | 0.20     | 0.19     | 0.22     | 0.01     | 0.14     | 0.15     | 0.19     | 0.18     | 0.12     | 0.06     | <0.01    | 0.04     | 0.01     | <0.01    | 0.13     | 0.19     |          |
| CaO                                    | 1.37     | 1.36     | 1.35     | 1.33     | 1.44     | 0.24     | 1.28     | 1.43     | 1.51     | 1.37     | 1.32     | 1.13     | 0.28     | 1.09     | 0.38     | 0.40     | 1.30     | 1.65     |          |
| Na <sub>2</sub> O                      | 5.84     | 6.17     | 5.91     | 5.33     | 5.77     | 4.97     | 5.60     | 5.28     | 5.10     | 5.54     | 5.60     | 5.61     | 4.86     | 5.04     | 5.72     | 6.31     | 5.38     | 5.78     |          |
| K <sub>2</sub> O                       | 6.17     | 6.13     | 5.82     | 6.29     | 5.59     | 4.32     | 5.80     | 5.85     | 5.71     | 5.86     | 5.70     | 5.69     | 4.63     | 4.34     | 4.41     | 5.82     | 5.80     | 5.46     |          |
| Subtotal                               | 96.92    | 97.63    | 97.35    | 96.09    | 97.09    | 95.13    | 96.33    | 95.18    | 96.02    | 96.81    | 96.36    | 96.33    | 90.70    | 95.13    | 93.08    | 94.90    | 95.81    | 97.18    |          |
| O=(Cl,F) <sub>2</sub>                  | 0.05     | 0.04     | 0.05     | 0.05     | 0.06     | 0.21     | 0.06     | 0.06     | 0.06     | 0.06     | 0.06     | 0.06     | 0.10     | 0.09     | 0.24     | 0.08     | 0.06     | 0.06     |          |
| Total                                  | 96.87    | 97.59    | 97.29    | 96.05    | 97.03    | 94.92    | 96.28    | 95.12    | 95.96    | 96.75    | 96.30    | 96.27    | 90.61    | 95.04    | 92.83    | 94.82    | 95.75    | 97.12    |          |
| Alkalinity <sup>c</sup>                | 0.97     | 1.00     | 1.01     | 0.91     | 0.98     | 1.22     | 0.95     | 0.94     | 0.92     | 0.96     | 0.98     | 1.00     | 1.24     | 1.25     | 1.36     | 1.05     | 0.95     | 0.99     |          |
| <i>Volatiles<sup>d</sup></i>           |          |          |          |          |          |          |          |          |          |          |          |          |          |          |          |          |          |          |          |
| Cl                                     | 711      | 784      | 810      | 619      | 943      | 3996     | 849      | 1113     | 849      | 850      | 1064     | 943      | 4280     | 4018     | 4037     | 1401     | 1124     | 1037     |          |
| F                                      | 773      | 614      | 864      | 760      | 995      | 2774     | 853      | 881      | 975      | 858      | 956      | 863      |          |          | 3636     | 1181     | 930      | 946      |          |
| S                                      | 171      | 153      | 192      | 160      | 224      | 91       | 189      | 193      | 229      | 180      | 190      | 153      |          |          | 91       | 164      | 208      | 222      |          |
| H <sub>2</sub> O wt%                   | 1.26     | 1.12     | 1.02     | 0.83     | 1.05     |          | 1.07     |          |          |          |          |          | 2.51     | 1.21     | 2.58     | 1.39     |          | 0.96     |          |
| <i>Trace Elements via SHRIMP (ppm)</i> |          |          |          |          |          |          |          |          |          |          |          |          |          |          |          |          |          |          |          |
| Li                                     | 19.3     | 12.7     | 22.9     | 19.0     | 25.3     | 61.9     | 20.5     | 22.4     | 28.2     | 25.7     | 24.7     | 24.1     |          |          | 55.4     | 17.6     | 26.2     | 21.9     |          |
| Be                                     | 3.6      | 3.1      | 4.2      | 3.3      | 4.6      | 17.5     | 4.3      | 4.3      | 4.5      | 4.3      | 4.9      | 6.3      |          |          | 18.3     | 5.6      | 5.1      | 4.7      |          |
| B                                      | 6.1      | 5.0      | 5.8      | 4.8      | 6.9      | 23.4     | 5.8      | 6.5      | 6.6      | 5.5      | 6.3      | 7.9      |          |          | 24.5     | 7.6      | 7.1      | 6.2      |          |
| Mg                                     | 2152     | 1887     | 2371     | 2088     | 2440     | 134.7    | 1681     | 1780     | 2259     | 1839     | 1383     | 681.8    |          |          | 163.9    | 75.8     | 1632     | 2127     |          |
| P                                      | 127.3    | 114.6    | 101.2    | 103.8    | 125.1    | 6.6      | 95.2     | 96.6     | 169.9    | 104.7    | 99.8     | 45.5     |          |          | 11.5     | 61.8     | 96.7     | 94.8     |          |
| Cu                                     |          |          |          |          |          |          |          |          |          |          |          |          |          |          |          |          |          |          |          |
| Rb                                     | 107.6    | 94.1     | 116.0    | 101.4    | 135.2    | 298.8    | 119.5    | 125.3    | 120.7    | 110.9    | 121.5    | 132.4    |          |          | 276.3    | 134.7    | 121.4    | 120.6    |          |
| Sr                                     | 11.0     | 22.2     | 5.2      | 11.2     | 3.4      | 1.0      | 8.0      | 4.2      | 4.7      | 4.5      | 6.7      | 1.7      |          |          | 1.1      | 2.4      | 4.0      | 4.2      |          |
| Y                                      | 23.2     | 19.4     | 26.0     | 21.5     | 29.8     | 85.0     | 25.2     | 27.4     | 26.6     | 23.4     | 28.7     | 35.8     |          |          | 102.1    | 40.3     | 27.5     | 29.4     |          |
| Zr                                     | 416      | 357      | 500      | 389      | 566      | 1886     | 497      | 523      | 482      | 456      | 535      | 704      |          |          | 2299     | 892      | 528      | 549      |          |
| Nb                                     | 59.2     | 48.9     | 67.6     | 51.1     | 79.8     | 246.2    | 69.1     | 71.1     | 64.1     | 62.3     | 72.5     | 93.0     |          |          | 292.7    | 103.2    | 74.6     | 75.1     |          |
| Cs                                     | 1.1      | 0.9      | 1.1      | 0.8      | 1.4      | 4.1      | 1.1      | 1.2      | 1.2      | 1.0      | 1.2      | 1.4      |          |          | 4.0      | 1.4      | 1.1      | 1.2      |          |
| Ba                                     | 42.4     | 101.8    | 19.6     | 47.4     | 8.4      | 5.1      | 34.3     | 16.5     | 41.9     | 15.8     | 23.9     | 4.3      |          |          | 5.8      | 7.9      | 14.3     | 15.0     |          |
| La                                     | 35.5     | 30.8     | 39.9     | 33.7     | 46.0     | 74.5     | 41.9     | 44.3     | 37.2     | 37.9     | 49.4     | 84.7     |          |          | 90.7     | 88.2     | 44.3     | 46.6     |          |
| Sm                                     | 7.9      | 6.6      | 7.9      | 7.0      | 9.6      | 16.3     | 8.1      | 8.2      | 8.2      | 7.8      | 9.8      | 12.7     |          |          | 21.1     | 13.4     | 8.7      | 10.1     |          |
| Ta                                     | 1.3      | 1.2      | 1.5      | 1.1      | 1.7      | 4.1      | 1.4      | 1.7      | 1.6      | 1.3      | 1.7      | 2.1      |          |          | 6.2      | 2.2      | 1.4      | 1.7      |          |
| Yb                                     | 3.1      | 2.2      | 3.4      | 2.3      | 4.3      | 11.1     | 2.8      | 3.6      | 4.0      | 2.6      | 4.4      | 4.7      |          |          | 14.1     | 5.5      | 3.6      | 4.2      |          |
| Hf                                     | 13.5     | 11.0     | 15.2     | 12.0     | 16.3     | 62.6     | 15.4     | 13.9     | 15.7     | 14.0     | 15.6     | 19.7     |          |          | 77.7     | 24.4     | 15.0     | 16.2     |          |
| Pb                                     | 26.4     | 23.4     | 26.6     | 24.6     | 28.1     | 83.9     | 24.9     | 26.7     | 30.4     | 22.3     | 27.8     | 27.8     |          |          | 102.8    | 31.0     | 26.4     | 28.1     |          |
| Th                                     | 8.6      | 7.3      | 9.6      | 8.0      | 12.4     | 37.8     | 10.2     | 9.9      | 10.2     | 9.0      | 11.3     | 15.5     |          |          | 50.0     | 18.0     | 10.7     | 11.6     |          |
| U                                      | 1.9      | 1.6      | 2.1      | 1.8      | 2.6      | 8.5      | 2.0      | 2.5      | 1.7      | 2.0      | 2.3      | 2.9      |          |          | 11.1     | 3.8      | 2.4      | 2.5      |          |

table S2 (continued, p6)

| Sample                                 | CBS   |
|----------------------------------------|-------|-------|-------|-------|-------|-------|-------|-------|-------|-------|-------|-------|-------|-------|-------|-------|-------|-------|
| Mi no.                                 | PX-8d | PX-8e | PX-8f | PX-9a | PX-9b | GM-1a | GM-1b | GM-1c | GM-1d | GM-1d | GM-2a | GM-2b | GM-2c | GM-2d | GM-3  | GM-4a | GM-4b | GM-6  |
| Host                                   | cpx   |
| Type <sup>a</sup>                      | t     | t     | t     | t     | t     | t     | t     | t     | t     | t     | t     | t     | t     | t     | t     | t     | t     | t     |
| SiO <sub>2</sub> (wt%) <sup>b</sup>    | 65.71 | 65.24 | 65.17 | 64.66 | 64.62 | 65.58 | 65.54 | 65.88 | 65.65 | 65.93 | 66.06 | 65.98 | 65.63 | 66.06 | 65.42 | 65.65 | 65.45 | 65.94 |
| TiO <sub>2</sub>                       | 0.49  | 0.42  | 0.45  | 0.61  | 0.55  | 0.45  | 0.47  | 0.45  | 0.49  | 0.48  | 0.45  | 0.47  | 0.48  | 0.44  | 0.50  | 0.44  | 0.46  | 0.45  |
| Al <sub>2</sub> O <sub>3</sub>         | 15.37 | 15.52 | 15.52 | 15.82 | 15.99 | 15.95 | 15.79 | 16.05 | 15.96 | 15.73 | 15.66 | 16.12 | 15.80 | 15.59 | 15.87 | 15.90 | 15.68 | 16.08 |
| FeO*                                   | 6.04  | 5.65  | 5.43  | 5.88  | 5.64  | 5.30  | 4.95  | 5.25  | 5.18  | 5.55  | 5.51  | 4.92  | 4.80  | 5.48  | 5.67  | 5.24  | 5.51  | 4.87  |
| MnO                                    | 0.50  | 0.20  | 0.16  | 0.17  | 0.18  | 0.17  | 0.15  | 0.13  | 0.14  | 0.14  | 0.15  | 0.13  | 0.15  | 0.16  | 0.12  | 0.16  | 0.20  | 0.15  |
| MgO                                    | 0.46  | 0.17  | 0.15  | 0.14  | 0.15  | 0.21  | 0.17  | 0.19  | 0.18  | 0.18  | 0.16  | 0.16  | 0.15  | 0.15  | 0.22  | 0.17  | 0.18  | 0.18  |
| CaO                                    | 2.19  | 1.52  | 1.50  | 1.51  | 1.42  | 1.39  | 1.47  | 1.38  | 1.35  | 1.47  | 1.51  | 1.44  | 1.36  | 1.56  | 1.62  | 1.38  | 1.43  | 1.34  |
| Na <sub>2</sub> O                      | 3.75  | 5.88  | 5.51  | 5.53  | 5.62  | 5.14  | 5.84  | 4.90  | 5.33  | 4.56  | 4.87  | 5.23  | 5.83  | 4.83  | 4.57  | 5.24  | 5.24  | 5.17  |
| K <sub>2</sub> O                       | 5.49  | 5.39  | 6.12  | 5.67  | 5.83  | 5.80  | 5.61  | 5.76  | 5.73  | 5.96  | 5.64  | 5.54  | 5.80  | 5.75  | 6.00  | 5.81  | 5.85  | 5.82  |
| Subtotal                               | 92.64 | 98.38 | 97.42 | 96.14 | 95.53 | 95.82 | 97.79 | 96.52 | 97.01 | 96.07 | 96.87 | 98.84 | 98.49 | 96.59 | 96.40 | 97.40 | 95.61 | 95.92 |
| O=(Cl,F) <sub>2</sub>                  | 0.01  | 0.07  | 0.06  | 0.02  | 0.06  | 0.06  | 0.06  | 0.06  | 0.06  | 0.06  | 0.06  | 0.06  | 0.06  | 0.07  | 0.06  | 0.07  | 0.07  | 0.06  |
| Total                                  | 92.63 | 98.32 | 97.36 | 96.12 | 95.47 | 95.76 | 97.73 | 96.46 | 96.95 | 96.01 | 96.81 | 98.78 | 98.43 | 96.52 | 96.34 | 97.33 | 95.54 | 95.85 |
| Alkalinity <sup>c</sup>                | 0.79  | 1.00  | 1.01  | 0.96  | 0.97  | 0.92  | 0.99  | 0.89  | 0.94  | 0.89  | 0.90  | 0.91  | 1.00  | 0.91  | 0.88  | 0.94  | 0.95  | 0.92  |
| <i>Volatiles<sup>d</sup></i>           |       |       |       |       |       |       |       |       |       |       |       |       |       |       |       |       |       |       |
| Cl                                     | 457   | 1103  | 1096  | 995   | 1113  | 820   | 753   | 901   | 798   | 1029  | 1057  | 987   | 1096  | 1241  | 986   | 1104  | 928   | 993   |
| F                                      | 891   | 975   | 749   |       | 790   | 934   | 986   | 944   | 945   | 933   | 881   | 936   | 900   | 891   | 884   | 1057  | 1087  | 1001  |
| S                                      | 196   | 197   | 285   |       | 199   | 209   | 201   | 202   | 207   | 199   | 207   | 180   | 275   | 210   | 179   | 210   | 177   | 205   |
| H <sub>2</sub> O wt%                   |       |       |       | 1.40  | 1.14  |       |       |       |       |       |       |       |       |       |       |       |       |       |
| <i>Trace Elements via SHRIMP (ppm)</i> |       |       |       |       |       |       |       |       |       |       |       |       |       |       |       |       |       |       |
| Li                                     | 23.7  | 17.9  | 23.0  | 20.5  | 20.8  | 23.8  | 23.6  | 24.5  | 23.4  | 21.2  | 23.9  | 25.8  | 25.5  | 13.3  | 21.7  | 19.9  | 22.1  | 19.1  |
| Be                                     | 5.0   | 4.6   | 4.4   | 4.3   | 4.3   | 4.7   | 5.0   | 4.8   | 4.6   | 4.7   | 5.4   | 4.9   | 4.7   | 3.2   | 4.6   | 4.1   | 4.1   | 4.4   |
| B                                      | 6.7   | 6.2   | 6.0   | 5.8   | 5.8   | 6.2   | 9.2   | 6.4   | 6.2   | 6.0   | 6.9   | 6.3   | 6.4   | 4.4   | 5.9   | 6.4   | 6.0   | 6.1   |
| Mg                                     | 2484  | 2072  | 12804 | 1680  | 1791  | 1999  | 1829  | 2022  | 2032  | 1865  | 1701  | 1665  | 10570 | 1714  | 1624  | 3957  | 1466  | 1938  |
| P                                      | 96.8  | 98.5  | 90.0  | 95.2  | 151.7 | 122.2 | 109.3 | 119.3 | 121.5 | 118.9 | 103.8 | 113.6 | 113.5 | 114.0 | 84.5  | 105.7 | 107.8 | 122.6 |
| Cu                                     |       |       |       |       |       |       |       |       |       |       |       |       |       |       |       |       |       |       |
| Rb                                     | 114.4 | 118.0 | 109.6 | 119.5 | 94.1  | 116.5 | 125.4 | 116.2 | 117.7 | 114.4 | 121.7 | 126.8 | 113.2 | 145.7 | 113.9 | 121.9 | 117.8 | 118.4 |
| Sr                                     | 4.1   | 4.1   | 4.0   | 8.0   | 8.1   | 5.8   | 6.6   | 5.6   | 5.7   | 5.4   | 4.5   | 4.6   | 4.6   | 5.1   | 6.2   | 5.4   | 5.9   | 5.1   |
| Y                                      | 28.3  | 30.4  | 31.8  | 25.2  | 26.6  | 27.0  | 28.6  | 27.8  | 26.8  | 28.3  | 28.7  | 26.7  | 28.3  | 33.2  | 25.1  | 25.2  | 24.5  | 25.8  |
| Zr                                     | 527   | 565   | 524   | 497   | 444   | 506   | 533   | 511   | 501   | 511   | 509   | 500   | 454   | 598   | 476   | 522   | 507   | 505   |
| Nb                                     | 70.2  | 74.1  | 65.8  | 69.1  | 60.1  | 68.9  | 75.6  | 70.0  | 69.8  | 70.1  | 70.0  | 69.1  | 61.9  | 79.8  | 65.7  | 62.7  | 62.5  | 69.5  |
| Cs                                     | 1.0   | 1.1   | 1.0   | 1.1   | 0.8   | 1.1   | 1.2   | 1.1   | 1.2   | 1.2   | 1.3   | 1.1   | 1.1   | 1.5   | 1.1   | 1.1   | 1.1   | 1.2   |
| Ba                                     | 14.0  | 13.8  | 13.0  | 34.3  | 39.5  | 21.4  | 22.6  | 21.4  | 21.3  | 20.1  | 15.8  | 17.1  | 15.9  | 17.7  | 23.9  | 20.7  | 23.9  | 18.5  |
| La                                     | 44.4  | 48.2  | 44.2  | 41.9  | 35.4  | 40.4  | 43.1  | 41.2  | 40.6  | 40.9  | 45.0  | 42.1  | 39.1  | 53.1  | 42.0  | 39.2  | 39.0  | 41.2  |
| Sm                                     | 8.3   | 10.5  | 9.6   | 8.1   | 7.3   | 8.1   | 9.2   | 8.6   | 7.9   | 8.9   | 8.8   | 8.7   | 8.2   | 10.3  | 8.6   | 8.4   | 8.3   | 8.6   |
| Ta                                     | 1.7   | 1.8   | 1.9   | 1.4   | 1.3   | 1.6   | 1.2   | 1.7   | 1.5   | 1.7   | 1.7   | 1.7   | 1.8   | 2.3   | 1.6   | 1.6   | 1.6   | 1.5   |
| Yb                                     | 3.9   | 4.5   | 3.7   | 2.8   | 3.5   | 3.1   | 4.5   | 3.7   | 4.5   | 4.5   | 4.0   | 2.8   | 4.1   | 4.9   | 3.7   | 3.0   | 2.6   | 3.7   |
| Hf                                     | 16.9  | 17.9  | 17.1  | 15.4  | 13.4  | 14.1  | 17.1  | 14.3  | 15.3  | 15.9  | 15.1  | 16.8  | 13.8  | 19.4  | 13.0  | 15.1  | 15.2  | 15.6  |
| Pb                                     | 31.0  | 32.6  | 30.9  | 24.9  | 21.7  | 25.2  | 25.7  | 29.5  | 28.1  | 33.7  | 29.3  | 28.1  | 28.3  | 35.1  | 26.2  | 17.3  | 18.9  | 26.0  |
| Th                                     | 11.4  | 12.8  | 10.0  | 10.2  | 8.2   | 11.0  | 11.4  | 10.5  | 10.6  | 10.2  | 10.9  | 10.7  | 9.1   | 12.2  | 10.1  | 9.1   | 9.2   | 9.9   |
| U                                      | 2.3   | 2.5   | 2.3   | 2.0   | 1.7   | 2.4   | 2.4   | 2.1   | 2.5   | 1.9   | 1.8   | 2.3   | 1.9   | 2.1   | 2.1   | 2.2   | 2.2   | 2.2   |



table S2 (continued, p7)

| Sample                                 | CBS<br>OL-<br>1a | CBS<br>OL-<br>1b | CBS<br>OL-<br>2b | CBS<br>OL-<br>2c | CBS<br>OL-3 | CBS<br>GM-<br>7 | Average<br>Trachytic<br>MI | Average<br>Comenditic<br>MI | Relative<br>Error<br>% |
|----------------------------------------|------------------|------------------|------------------|------------------|-------------|-----------------|----------------------------|-----------------------------|------------------------|
| Mi no.                                 | ol               | ol               | ol               | ol               | ol          | ol              |                            |                             |                        |
| Host<br>Type <sup>a</sup>              | t                | t                | t                | t                | t           | t               |                            |                             |                        |
| SiO <sub>2</sub><br>(wt%) <sup>b</sup> | 64.80            | 65.03            | 67.19            | 66.74            | 64.94       | 65.54           | 65.67                      | 75.23                       | 2.3                    |
| TiO <sub>2</sub>                       | 0.42             | 0.36             | 0.41             | 0.40             | 0.42        | 0.43            | 0.44                       | 0.21                        | 8.4                    |
| Al <sub>2</sub> O <sub>3</sub>         | 15.71            | 15.32            | 15.43            | 15.92            | 15.03       | 15.60           | 15.91                      | 10.59                       | 3.4                    |
| FeO*                                   | 5.93             | 6.55             | 4.51             | 4.35             | 7.41        | 5.91            | 4.99                       | 4.23                        | 5.2                    |
| MnO                                    | 0.20             | 0.22             | 0.14             | 0.22             | 0.24        | 0.18            | 0.17                       | 0.10                        | 15.6                   |
| MgO                                    | 0.15             | 0.13             | 0.10             | 0.18             | 0.22        | 0.16            | 0.17                       | 0.02                        | 7.5                    |
| CaO                                    | 1.30             | 1.36             | 1.40             | 1.06             | 1.34        | 1.39            | 1.35                       | 0.28                        | 5.8                    |
| Na <sub>2</sub> O                      | 5.93             | 5.84             | 5.75             | 5.79             | 4.88        | 5.11            | 5.57                       | 5.00                        | 5.9                    |
| K <sub>2</sub> O                       | 5.56             | 5.18             | 5.07             | 5.33             | 5.53        | 5.69            | 5.73                       | 4.37                        | 3.6                    |
| Subtotal                               | 97.37            | 97.95            | 97.87            | 97.85            | 96.29       | 96.87           | 96.84                      | 93.96                       | 1.8                    |
| O=(Cl,F) <sub>2</sub>                  | 0.07             | 0.07             |                  |                  | 0.06        | 0.06            | 0.06                       | 0.23                        | 4.1                    |
| Total                                  | 97.30            | 97.89            | 97.87            | 97.85            | 96.22       | 96.81           | 96.79                      | 93.79                       | 1.8                    |
| Alkalinity <sup>c</sup>                | 1.00             | 0.99             | 0.97             | 0.96             | 0.93        | 0.93            | 0.97                       | 1.23                        | 4.8                    |
| <i>Volatiles<sup>d</sup></i>           |                  |                  |                  |                  |             |                 |                            |                             |                        |
| Cl                                     | 967              | 1332             | 1579             | 1304             | 990         | 906             | 986                        | 3974                        | 5.4                    |
| F                                      | 1064             | 902              |                  |                  | 973         | 996             | 919                        | 3355                        | 3.1                    |
| S                                      | 184              | 160              |                  |                  | 197         | 188             | 197                        | 112                         | 2.5                    |
| H <sub>2</sub> O wt%                   | 1.21             |                  |                  |                  |             |                 | 1.71                       | 2.58                        | 12.6                   |
| <i>Trace Elements via SHRIMP (ppm)</i> |                  |                  |                  |                  |             |                 |                            |                             |                        |
| Li                                     | 16.9             | 21.0             |                  |                  | 21.2        | 17.5            | 21.7                       | 62.1                        | 8.9                    |
| Be                                     | 5.0              | 4.8              |                  |                  | 5.5         | 4.6             | 4.6                        | 18.9                        | 7.4                    |
| B                                      | 6.6              | 9.1              |                  |                  | 7.4         | 6.0             | 6.4                        | 26.8                        | 5.0                    |
| Mg                                     | 2314             | 1368             |                  |                  | 2186        | 1652            | 2458.7                     | 222.9                       | 2.5                    |
| P                                      | 86.7             | 81.5             |                  |                  | 90.5        | 110.0           | 105.3                      | 8.1                         | 1.8                    |
| Cu                                     |                  |                  |                  |                  |             |                 |                            | 14.5                        | 12.0                   |
| Rb                                     | 118.5            | 167.3            |                  |                  | 120.1       | 118.2           | 119.9                      | 342.4                       | 4.2                    |
| Sr                                     | 3.2              | 1.3              |                  |                  | 4.8         | 3.9             | 5.6                        | 1.8                         | 4.3                    |
| Y                                      | 31.1             | 34.1             |                  |                  | 28.3        | 29.4            | 28.0                       | 100.1                       | 4.2                    |
| Zr                                     | 603              | 928              |                  |                  | 547         | 502             | 534.0                      | 2224.8                      | 3.3                    |
| Nb                                     | 80.5             | 122.4            |                  |                  | 75.1        | 70.6            | 71.6                       | 288.3                       | 3.5                    |
| Cs                                     | 1.3              | 1.8              |                  |                  | 1.2         | 1.2             | 1.2                        | 4.7                         | 3.4                    |
| Ba                                     | 10.9             | 3.6              |                  |                  | 14.6        | 13.1            | 22.2                       | 6.4                         | 3.4                    |
| La                                     | 52.4             | 129.6            |                  |                  | 46.7        | 45.4            | 47.4                       | 91.5                        | 3.8                    |
| Sm                                     | 10.0             | 14.1             |                  |                  | 8.8         | 9.8             | 9.1                        | 20.7                        | 5.0                    |
| Ta                                     | 2.1              | 2.0              |                  |                  | 1.8         | 1.8             | 1.6                        | 5.6                         | 6.7                    |
| Yb                                     | 4.5              | 4.8              |                  |                  | 3.9         | 4.7             | 3.8                        | 13.1                        | 15.1                   |
| Hf                                     | 18.0             | 29.8             |                  |                  | 17.7        | 16.0            | 16.2                       | 73.9                        | 8.4                    |
| Pb                                     | 35.2             | 38.6             |                  |                  | 33.8        | 28.8            | 27.8                       | 101.1                       | 4.7                    |
| Th                                     | 13.1             | 20.7             |                  |                  | 11.3        | 10.3            | 11.0                       | 47.5                        | 7.8                    |
| U                                      | 2.9              | 4.1              |                  |                  | 2.7         | 2.3             | 2.3                        | 10.7                        | 6.1                    |

**table S3.** Compositions of phases use in least squares linear regression modeling. Observed trachyte and comendite are average matrix glass compositions from CBS-TPUM and PEK-62, respectively.

|                                | Observed<br>Trachyte | Observed<br>Comendite | Feldspar<br>An <sub>0</sub> Ab <sub>66</sub> Or <sub>34</sub> | Feldspar<br>An <sub>10</sub> Ab <sub>51</sub> Or <sub>39</sub> | Pyroxene<br>Wo <sub>43</sub> En <sub>03</sub> Fe <sub>54</sub> | Pyroxene<br>Wo <sub>44</sub> En <sub>20</sub> Fe <sub>36</sub> | Olivine<br>Fa <sub>98</sub> | Quartz | Ilmenite | Apatite |
|--------------------------------|----------------------|-----------------------|---------------------------------------------------------------|----------------------------------------------------------------|----------------------------------------------------------------|----------------------------------------------------------------|-----------------------------|--------|----------|---------|
| SiO <sub>2</sub>               | 65.65                | 75.22                 | 67.33                                                         | 65.64                                                          | 48.92                                                          | 50.20                                                          | 29.68                       | 99.97  | 0        | 0       |
| TiO <sub>2</sub>               | 0.44                 | 0.21                  | 0                                                             | 0.43                                                           | 0.27                                                           | 0.51                                                           | 0.02                        | 0.01   | 51.07    | 0       |
| Al <sub>2</sub> O <sub>3</sub> | 15.91                | 10.58                 | 18.49                                                         | 15.84                                                          | 0.17                                                           | 0.82                                                           | 0.24                        | 0.02   | 0        | 0       |
| FeO*                           | 4.99                 | 4.23                  | 0.59                                                          | 5.00                                                           | 29.24                                                          | 20.12                                                          | 66.87                       | 0      | 47.59    | 0.02    |
| MnO                            | 0.17                 | 0.10                  | 0                                                             | 0.17                                                           | 0.93                                                           | 0.79                                                           | 2.38                        | 0      | 1.24     | 0.02    |
| MgO                            | 0.17                 | 0.02                  | 0                                                             | 0.06                                                           | 0.82                                                           | 6.93                                                           | 0.57                        | 0      | 0.05     | 0       |
| CaO                            | 1.35                 | 0.28                  | 0.01                                                          | 1.36                                                           | 18.23                                                          | 20.15                                                          | 0.21                        | 0      | 0.05     | 57.68   |
| Na <sub>2</sub> O              | 5.57                 | 4.99                  | 7.49                                                          | 5.67                                                           | 1.38                                                           | 0.48                                                           | 0.01                        | 0      | 0        | 0       |
| K <sub>2</sub> O               | 5.73                 | 4.36                  | 6.09                                                          | 5.88                                                           | 0.02                                                           | 0                                                              | 0.03                        | 0      | 0        | 0       |
| P <sub>2</sub> O <sub>5</sub>  | 0.02                 | 0.001                 | 0                                                             | 0.01                                                           | 0                                                              | 0                                                              | 0                           | 0      | 0        | 42.28   |

**table S4. Results of least squares linear regression modeling of the derivation of PEK-62 comendite from CBS-TPUM trachyte.** “Observed Trachyte” represents the average composition of trachytic matrix glass in sample CBS-TPUM. “Estimated Trachyte” 1 and 2 represent the most successful results of least squares linear regression modeling performed using the compositions in Table S3. Numbers below the major element compositions represent the coefficients (phase proportions) calculated for each phase for successful runs 1 and 2. Two dashes indicate that phase was not used in the analysis. Compositions listed in the Observed column represent those used as independent variables and correspond to those listed in table S3.

|                                | Observed                                           | Estimated Trachyte |       |
|--------------------------------|----------------------------------------------------|--------------------|-------|
|                                | Trachyte                                           | 1                  | 2     |
| SiO <sub>2</sub>               | 65.65                                              | 65.64              | 65.64 |
| TiO <sub>2</sub>               | 0.44                                               | 0.43               | 0.43  |
| Al <sub>2</sub> O <sub>3</sub> | 15.91                                              | 15.85              | 15.84 |
| FeO*                           | 4.99                                               | 4.99               | 5.00  |
| MnO                            | 0.17                                               | 0.17               | 0.17  |
| MgO                            | 0.17                                               | 0.20               | 0.06  |
| CaO                            | 1.35                                               | 1.36               | 1.36  |
| Na <sub>2</sub> O              | 5.57                                               | 5.66               | 5.67  |
| K <sub>2</sub> O               | 5.73                                               | 5.87               | 5.88  |
| P <sub>2</sub> O <sub>5</sub>  | 0.02                                               | 0.02               | 0.01  |
| Wt. fraction comendite         |                                                    | 0.21               | 0.21  |
| Feldspar                       | An <sub>0</sub> Ab <sub>66</sub> Or <sub>34</sub>  | 0.22               | 0.21  |
| Feldspar                       | An <sub>10</sub> Ab <sub>51</sub> Or <sub>39</sub> | 0.48               | 0.49  |
| Pyroxene                       | Wo <sub>43</sub> En <sub>03</sub> Fe <sub>54</sub> | 0.02               | 0.05  |
| Pyroxene                       | Wo <sub>44</sub> En <sub>20</sub> Fe <sub>36</sub> | 0.02               | --    |
| Olivine                        | Fa <sub>98</sub>                                   | 0.04               | 0.03  |
| Quartz                         |                                                    | --                 | --    |
| Ilmenite                       |                                                    | 0.01               | 0.01  |
| Apatite                        |                                                    | <0.01              | <0.01 |

**table S5. H<sub>2</sub>O contents in comenditic MI and modeled saturation pressures.**  
 Saturation pressures calculated using the model of (19) at 720°C.

| Sample     | H <sub>2</sub> O wt% | Saturation P (bar) |
|------------|----------------------|--------------------|
| PKTU-1     | 2.73                 | 445                |
| PKTU-2     | 1.77                 | 200                |
| PKTU-3     | 2.95                 | 513                |
| PKTU-4a    | 2.42                 | 357                |
| PKTU-4b    | 2.02                 | 256                |
| PKTU-5     | 2.73                 | 445                |
| PKTU-7     | 1.65                 | 176                |
| PKTU-8     | 2.70                 | 436                |
| PKTU-9     | 2.28                 | 320                |
| PKTU-10    | 2.18                 | 295                |
| P-26-1     | 2.94                 | 510                |
| P-26-PX-1a | 4.36                 | 1046               |
| P-26-PX-1b | 2.62                 | 413                |
| P-62-1     | 3.00                 | 529                |
| P-62-2a    | 1.85                 | 218                |
| P-62-2b    | 2.39                 | 349                |
| P-62-3     | 1.50                 | 148                |
| P-62-6     | 3.30                 | 629                |
| P-62-7a    | 1.39                 | 128                |
| P-62-7b    | 1.88                 | 224                |
| P-62-7c    | 2.32                 | 331                |
| P-62-8     | 2.82                 | 472                |
| P-62-9     | 3.31                 | 633                |
| P-62-10    | 1.71                 | 188                |
| P-62-12a   | 1.77                 | 200                |
| P-62-12b   | 2.33                 | 333                |
| P-62-14    | 1.82                 | 211                |
| P-62-15    | 2.90                 | 497                |
| P-62-16    | 4.23                 | 990                |
| P-62-18    | 1.71                 | 188                |
| P-62-PX-3  | 1.58                 | 163                |
| CBS-2a     | 2.26                 | 315                |
| CBS-PX-1a  | 2.51                 | 382                |
| CBS-PX-1c  | 1.21                 | 99                 |
| CBS-PX-1d  | 2.58                 | 767                |
